# Supplementary material
Source: Springer Nature journal article supplement (https://www.springermedizin.de/resource/supplementary/12883_2012_711_MOESM2_ESM.pdf/9456242)
Supplement: MOESM2 [file 9456242]

# STUDY FLOW

**ICARE Referral**  
(acute, inpatient and outpatient rehabilitation, community settings)

**Express Chart Screen**

**HIPAA Authorization &  
Screening Informed Consent**

**Brief Clinical Screen**

**Detailed Clinical Screen**

**Study Informed Consent &  
Consent to be Videotaped**

**Brief Medical Exam &  
Baseline Evaluation**

**Randomization**

**ASAP**

**DEUCC**

**UCC**

**Immediate Post-Intervention Evaluation**

**6-month Post-Randomization Evaluation**

**12-month Post-Randomization Evaluation**
